# Supplementary material for: The Effect of the Tau Protein on D. melanogaster Lifespan Depends on GSK3 Expression and Sex
Source: MDPI journal article supplement (doi:10.3390/ijms24032166), 2023-01-21
Supplement: s1 [file s1]

## Tables with descriptive statistics of lifespan measurements

Abbreviations: M-W: Mann-Whitney; K-S: Kolmogorv-Smirnov

| experiment                 | N   | mean  | median | min | max | lower quartile | upper quartile | 10%  | 90%  | dispersion  | std.deviation | std.error   | M-W      | K-S      |
|----------------------------|-----|-------|--------|-----|-----|----------------|----------------|------|------|-------------|---------------|-------------|----------|----------|
| tauUP-Control males exp1   | 50  | 55,92 | 58     | 7   | 100 | 49             | 68,75          | 13,8 | 80,2 | 476,9730612 | 21,83971294   | 3,088601824 | 0.388561 | 0.271914 |
| tauUP males exp1           | 50  | 54,82 | 56     | 6   | 80  | 54             | 62             | 40,1 | 69,6 | 241,742449  | 15,54806898   | 2,198829002 |          |          |
| tauUP males exp1           | 50  | 54,82 | 56     | 6   | 80  | 54             | 62             | 40,1 | 69,6 | 241,742449  | 15,54806898   | 2,198829002 | 0.242137 | 0.039195 |
| tauUPmut males exp1        | 50  | 56,52 | 62,5   | 10  | 85  | 51,25          | 74             | 15,8 | 75   | 412,9893878 | 20,32214033   | 2,873984648 |          |          |
| tayUP-Control males exp2   | 100 | 57,02 | 60     | 14  | 96  | 49             | 72,5           | 18,7 | 78,3 | 446,5046465 | 21,13065656   | 2,113065656 | 0.015896 | 0.211170 |
| tauUP males exp2           | 100 | 50,2  | 54,5   | 6   | 94  | 39,25          | 70             | 13,8 | 75   | 492,6060606 | 22,19473047   | 2,219473047 |          |          |
| tauUP males exp2           | 100 | 50,2  | 54,5   | 6   | 94  | 39,25          | 70             | 13,8 | 75   | 492,6060606 | 22,19473047   | 2,219473047 | 0.512425 | 0.368188 |
| tauUPmut males exp2        | 100 | 49,38 | 52     | 8   | 85  | 36             | 60             | 21,9 | 77,1 | 352,8844444 | 18,78521878   | 1,878521878 |          |          |
| tauUP-Control females exp1 | 50  | 74,16 | 80,5   | 8   | 97  | 65,5           | 85,75          | 46,4 | 92,2 | 369,6473469 | 19,2262151    | 2,718997414 | 0.005675 | 0.021708 |
| tauUP females exp1         | 50  | 64,94 | 70,5   | 10  | 91  | 59             | 79             | 22,7 | 84,2 | 440,7922449 | 20,99505287   | 2,969148851 |          |          |
| tauUP females exp1         | 50  | 64,94 | 70,5   | 10  | 91  | 59             | 79             | 22,7 | 84,2 | 440,7922449 | 20,99505287   | 2,969148851 | 0.320551 | 0.178587 |
| tauUPmut females exp1      | 50  | 61,88 | 69     | 14  | 87  | 60,25          | 74,75          | 23,5 | 82   | 435,4955102 | 20,86852918   | 2,9512557   |          |          |
| tauUP-Control females exp2 | 100 | 73,48 | 77,5   | 18  | 105 | 67             | 86             | 52,9 | 90,1 | 313,7874747 | 17,71404738   | 1,771404738 | 0.000000 | 0.000000 |
| tauUP females exp2         | 100 | 52,46 | 62     | 8   | 94  | 31,75          | 71,25          | 14   | 77   | 575,6246465 | 23,99217886   | 2,399217886 |          |          |
| tauUP females exp2         | 100 | 52,46 | 62     | 8   | 94  | 31,75          | 71,25          | 14   | 77   | 575,6246465 | 23,99217886   | 2,399217886 | 0.362538 | 0.154839 |
| tauUPmut females exp2      | 100 | 56,62 | 62     | 9   | 87  | 49             | 71,25          | 19   | 76   | 406,8238384 | 20,16987453   | 2,016987453 |          |          |

Table S1. Statistical analysis for the lifespan measurement in species with pan neuronal overexpression of *tau* transgenes.

| experiment                    | N   | mean  | median | min | max | lower quartile | upper quartile | 10%  | 90%  | dispersion  | std.deviation | std.error   | M-W      | K-S      |
|-------------------------------|-----|-------|--------|-----|-----|----------------|----------------|------|------|-------------|---------------|-------------|----------|----------|
| tauUP_sggControl males exp1   | 100 | 47,82 | 52     | 6   | 78  | 40             | 59             | 23,3 | 62   | 265,8056566 | 16,30354736   | 1,630354736 | 0.000000 | 0.000000 |
| tauUP_sggUP males exp1        | 100 | 1,76  | 1      | 1   | 7   | 1              | 2              | 1    | 3    | 1,295353535 | 1,138135992   | 0,113813599 |          |          |
| tauUP_sggUP males exp1        | 100 | 1,76  | 1      | 1   | 7   | 1              | 2              | 1    | 3    | 1,295353535 | 1,138135992   | 0,113813599 | 0.110500 | 0.583009 |
| tauUPmut_sggUP males exp1     | 100 | 2,07  | 2      | 0   | 7   | 1              | 2              | 1    | 4    | 2,005151515 | 1,416033727   | 0,141603373 |          |          |
| tauUP_sggControl males exp2   | 100 | 41,3  | 43,5   | 5   | 88  | 24             | 55             | 14,8 | 67   | 396,0505051 | 19,90101769   | 1,990101769 | 0.000000 | 0.000000 |
| tauUP_sggUP males exp2        | 100 | 3,27  | 3      | 1   | 7   | 2              | 5              | 1    | 6    | 2,845555556 | 1,686877457   | 0,168687746 |          |          |
| tauUP_sggUP males exp2        | 100 | 3,27  | 3      | 1   | 7   | 2              | 5              | 1    | 6    | 2,845555556 | 1,686877457   | 0,168687746 | 0.195715 | 0.815415 |
| tauUPmut_sggUP males exp2     | 100 | 2,96  | 3      | 1   | 8   | 2              | 4              | 1    | 5    | 2,564040404 | 1,601262128   | 0,160126213 |          |          |
| tauUP_sggControl females exp1 | 100 | 55,23 | 61     | 8   | 84  | 46             | 68,5           | 22   | 76   | 376,0980808 | 19,39324833   | 1,939324833 | 0.000000 | 0.000000 |
| tauUP_sggUP females exp1      | 100 | 3,96  | 2      | 1   | 33  | 1              | 4              | 1    | 6,1  | 39,69535354 | 6,300424869   | 0,630042487 |          |          |
| tauUP_sggUP females exp1      | 100 | 3,96  | 2      | 1   | 33  | 1              | 4              | 1    | 6,1  | 39,69535354 | 6,300424869   | 0,630042487 | 0.631596 | 0.908411 |
| tauUPmut_sggUP females exp1   | 100 | 2,57  | 2      | 1   | 8   | 1              | 4              | 1    | 5    | 3,318282828 | 1,821615445   | 0,182161544 |          |          |
| tauUP_sggControl females exp2 | 100 | 61,49 | 68     | 13  | 89  | 60             | 76             | 16,9 | 78,1 | 459,0605051 | 21,42569731   | 2,142569731 | 0.000000 | 0.000000 |
| tauUP_sggUP females exp2      | 100 | 2,92  | 2      | 1   | 12  | 2              | 4              | 1    | 5    | 3,508686869 | 1,873148918   | 0,187314892 |          |          |
| tauUP_sggUP females exp2      | 100 | 2,92  | 2      | 1   | 12  | 2              | 4              | 1    | 5    | 3,508686869 | 1,873148918   | 0,187314892 | 0.668639 | 0.999999 |
| tauUPmut_sggUP females exp2   | 100 | 2,78  | 2      | 1   | 8   | 2              | 4              | 1    | 5    | 2,658181818 | 1,630393148   | 0,163039315 |          |          |

Table S2. Statistical analysis for the lifespan measurement in species with simultaneous pan neuronal overexpression of *tau* and *shaggy* transgenes.

| experiment            | N   | mean  | median | min | max | lower quartile | upper quartile | 10%  | 90%  | dispersion  | std.deviation | std.error | M-W      | K-S      |
|-----------------------|-----|-------|--------|-----|-----|----------------|----------------|------|------|-------------|---------------|-----------|----------|----------|
| tauKD_Control males   | 100 | 62,49 | 60,5   | 26  | 96  | 56             | 74,25          | 46,7 | 80   | 196,8584848 | 14,03062667   | 1,403063  | 0.986348 | 0.053902 |
| tauKD males           | 100 | 58,77 | 67,5   | 8   | 94  | 45,75          | 77             | 12,9 | 87   | 608,9667677 | 24,67725203   | 2,467725  |          |          |
|                       |     |       |        |     |     |                |                |      |      |             |               |           |          |          |
| tauKD_Control females | 100 | 75,12 | 84     | 13  | 98  | 70             | 90,25          | 37   | 93   | 454,5713131 | 21,32067806   | 2,132068  | 0.011968 | 0.000120 |
| tauKD females         | 100 | 74,35 | 77     | 13  | 105 | 69,75          | 83             | 59   | 88,1 | 229,9469697 | 15,16400243   | 1,5164    |          |          |

Table S3. Statistical analysis for the lifespan measurement in species with pan neuronal knockdown of *tau* gene.

| experiment                    | N   | mean  | median | min | max | lower quartile | upper quartile | 10%  | 90%  | dispersion  | std.deviation | std.error | M-W      | K-S      |
|-------------------------------|-----|-------|--------|-----|-----|----------------|----------------|------|------|-------------|---------------|-----------|----------|----------|
| tauKD_sggControl males exp1   | 50  | 60,96 | 63,5   | 15  | 100 | 48,25          | 80             | 21,9 | 87,1 | 600,5289796 | 24,5056928    | 3,465628  | 0.000000 | 0.000000 |
| tauKD_sggUP males exp1        | 50  | 4,26  | 4,5    | 1   | 7   | 2              | 6              | 2    | 7    | 3,624897959 | 1,903916479   | 0,269254  |          |          |
|                               |     |       |        |     |     |                |                |      |      |             |               |           |          |          |
| tauKD_sggControl males exp2   | 100 | 58,91 | 62,5   | 7   | 97  | 48,25          | 75             | 30,4 | 79   | 392,4261616 | 19,80974916   | 1,980975  | 0.000000 | 0.000000 |
| tauKD_sggUP males exp2        | 100 | 2,68  | 2      | 1   | 12  | 1              | 3              | 1    | 5    | 3,694545455 | 1,922120042   | 0,192212  |          |          |
|                               |     |       |        |     |     |                |                |      |      |             |               |           |          |          |
| tauKD_sggControl females exp1 | 50  | 75,26 | 74     | 20  | 99  | 64             | 87             | 62   | 92,3 | 218,4412245 | 14,77975725   | 2,090173  | 0.000000 | 0.000000 |
| tauKD_sggUP females exp1      | 50  | 19,86 | 17,5   | 2   | 47  | 6,5            | 33,75          | 2,9  | 39,1 | 215,0616327 | 14,6649798    | 2,073941  |          |          |
|                               |     |       |        |     |     |                |                |      |      |             |               |           |          |          |
| tauKD_sggControl females exp2 | 100 | 63,47 | 66     | 9   | 104 | 53,75          | 79             | 30,8 | 83   | 430,8778788 | 20,7575981    | 2,07576   | 0.000000 | 0.000000 |
| tauKD_sggUP females exp2      | 100 | 17,7  | 16,5   | 2   | 65  | 7              | 25             | 4    | 36   | 158,2727273 | 12,58064892   | 1,258065  |          |          |

Table S4. Statistical analysis for the lifespan measurement in species with simultaneous pan neuronal knockdown of *tau* gene and *shaggy* overexpression.
